# Supplementary material
Source: publisher site journal article supplement (https://www.dovepress.com/article/354619)

Table S1. MR results of the association between leukocyte TL and the risk of JIA associated iridocyclitis.

|  | N | OR (95% CI) | P-value | P-value for heterogeneity | P-value for intercept | P-value for distortion | N | OR (95% CI) | P-value | P-value for heterogeneity | P-value for intercept | P-value for distortion |
| --- | --- | --- | --- | --- | --- | --- | --- | --- | --- | --- | --- | --- |
|  | Full-set | | | | | | Proxy SNPs not identified in outcome | | | | | |
| IVW | 10 | 1.75 (0.81-3.79) | 0.155 | 0.185 | - | - | 14 | 1.65 (0.84-3.27) | 0.147 | 0.109 | - | - |
| Maximum likelihood | 10 | 1.78 (0.91-3.47) | 0.089 | 0.189 | - | - | 14 | 1.68 (0.97-2.93) | 0.063 | 0.110 | - | - |
| MR-PRESSO | 10 | 1.75 (0.81-3.80) | 0.189 | - | - | 0.198 | 14 | 1.65 (0.84-3.27) | 0.178 | - | - | 0.126 |
| MR-RAPS | 10 | 1.78 (0.91-3.47) | 0.091 | - | - | - | 14 | 1.67 (0.96-2.91) | 0.067 | - | - | - |
| MR-Egger intercept | 10 | - | - | - | 0.565 | - | 14 | - | - | - | 0.739 | - |

**Abbreviation:** MR, mendelian randomization; TL, telomere length; JIA, juvenile idiopathic arthritis; N, the number of SNPs used in MR analysis; OR, odds ratio; CI, confidence interval; IVW, inverse variance weighted; PRESSO, pleiotropy residual sum and outlier; RAPS, robust adjusted profile score.

Figure S1. Radial plots to visualize individual outlier SNPs in the MR estimates for effect of leukocyte TL and risk of JIA associated iridocyclitis.


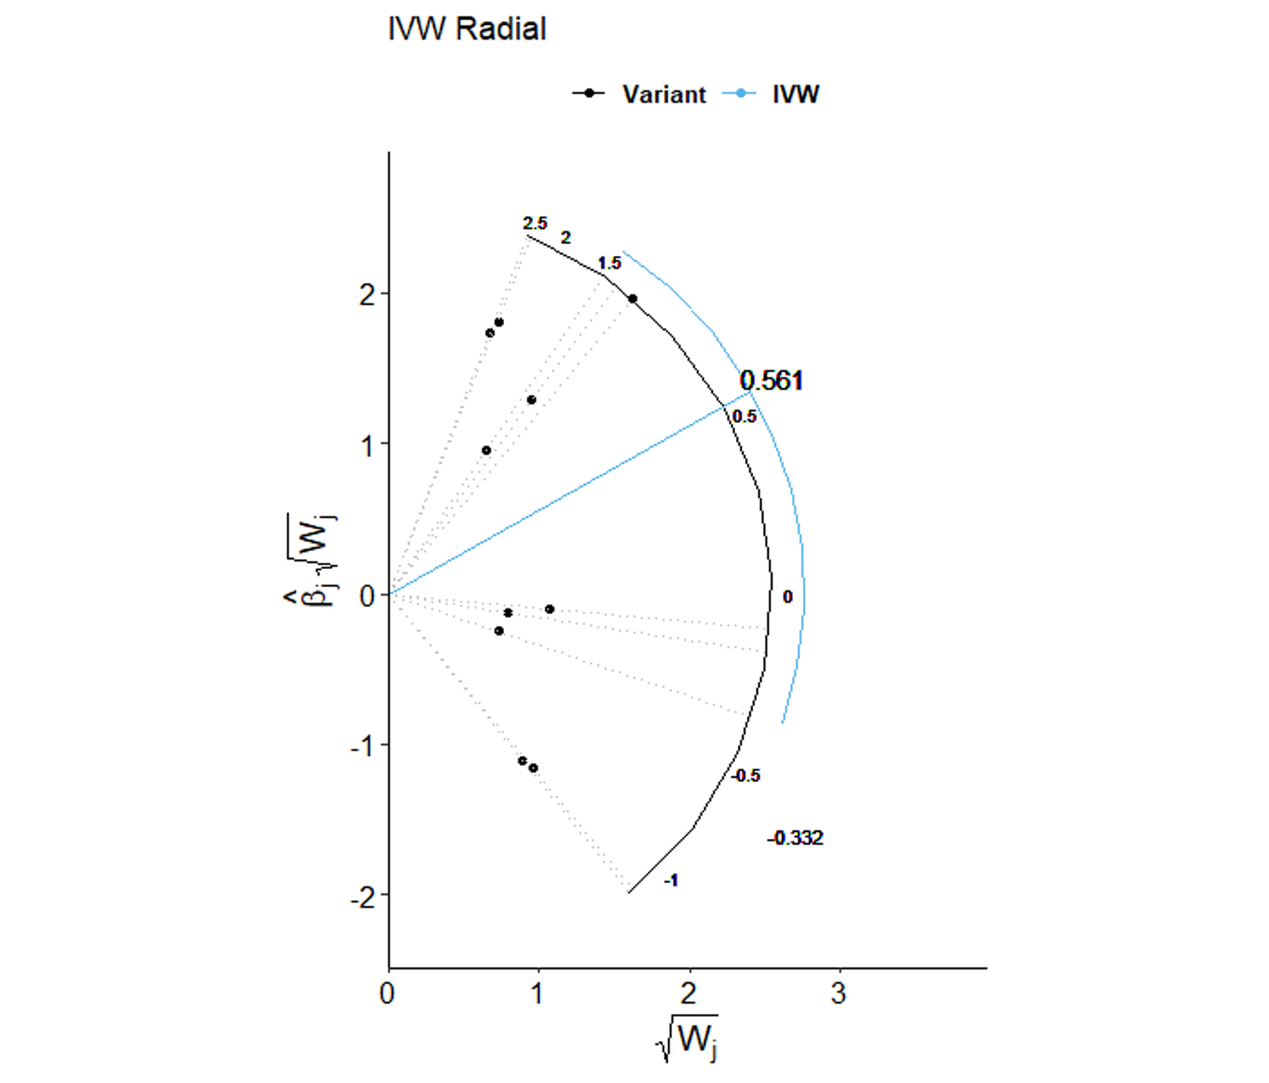


The radial curve displays the ratio estimate for each SNPs, as well as the overall inverse-variance weighted (in blue). Black dots show valid SNPs. IVW, inverse variance weighted method.

Figure S2. Leave-one-out analysis for the effects of SNPs on leukocyte TL and JIA.


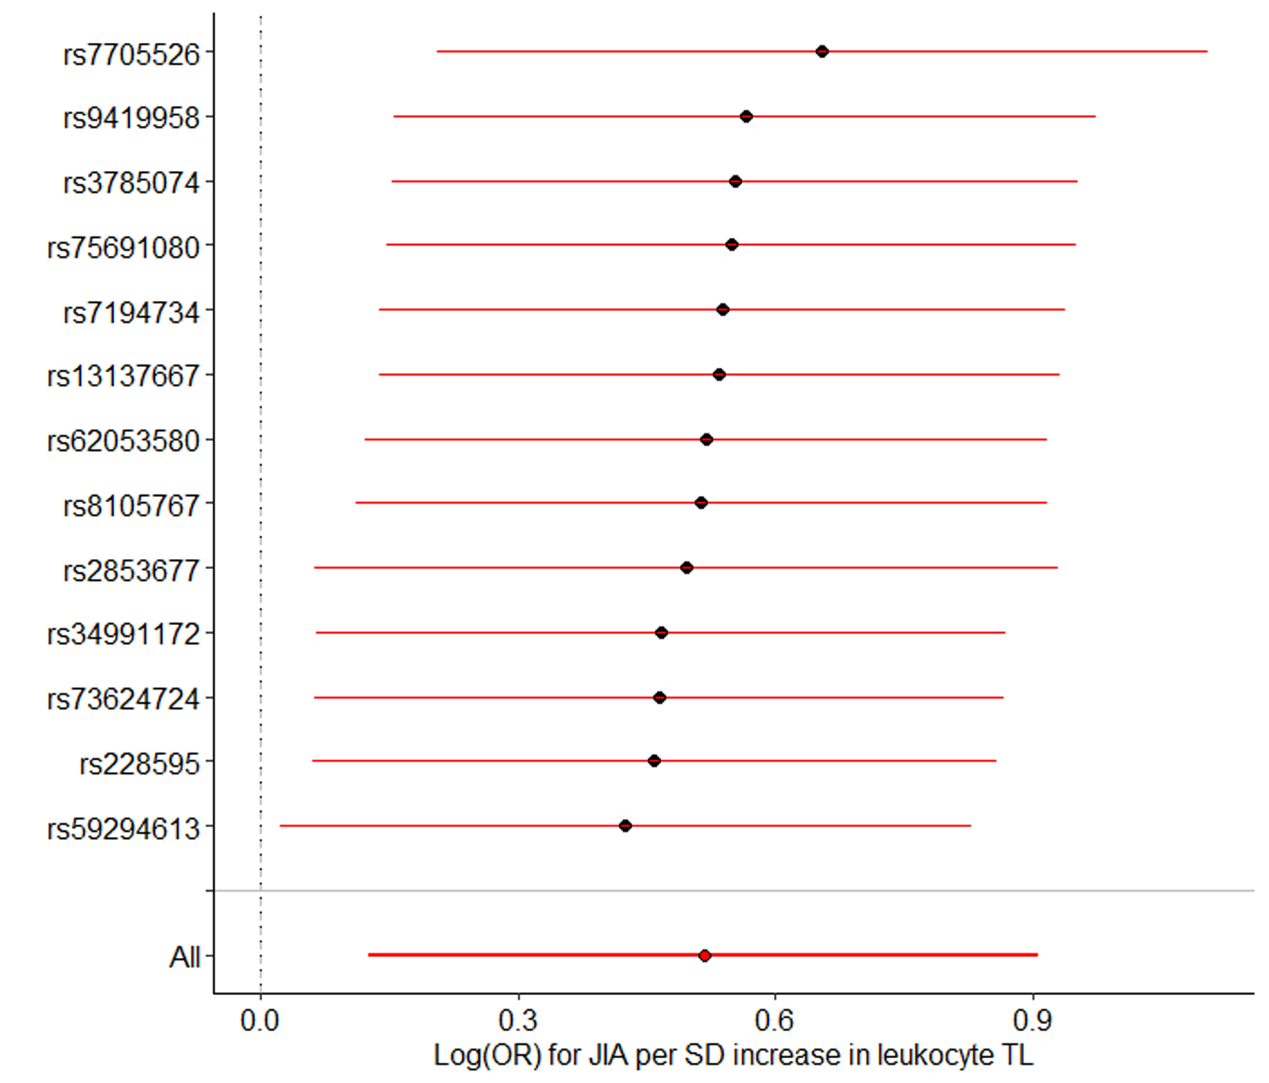


Figure S3. Leave-one-out analysis for the estimates for leukocyte TL on JIA associated iridocyclitis.


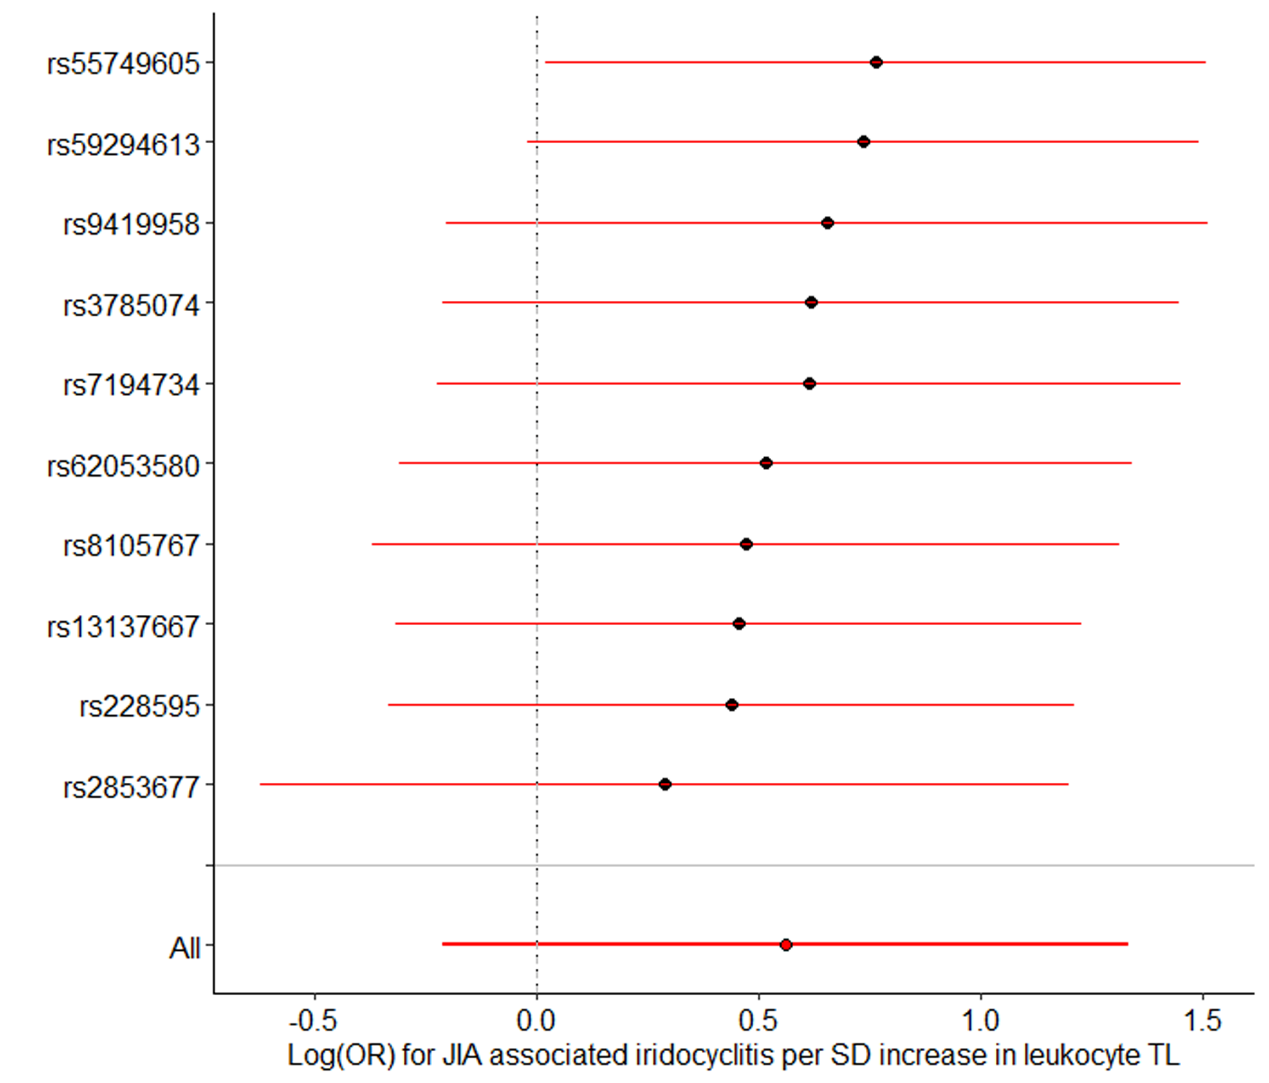

Supplement: Supplementary file 1 [file get_supplementary_file.php]
